# Supplementary material for: Resetting of the 24-nt siRNA landscape in rice zygotes
Source: PubMed Central journal article supplement — Genome Res. 2022 Feb;32(2):309–23. doi: 10.1101/gr.275981.121 (PMC8805726; doi:10.1101/gr.275981.121), 2022-02
Supplement: supp_gr.275981.121_Supplemental_Figures_2021_12_09.pdf [file supp_gr.275981.121_Supplemental_Figures_2021_12_09.pdf]

## Supplemental Figures and Legends

### Table of Contents

- Fig S1: miRNA accumulation pattern across cell types, supporting Fig 1.
- Fig S2: genomic distribution of siren loci, supporting Fig 2.
- Fig S3: siRNA accumulation pattern across cell types, supporting Fig 3 and Fig 4.
- Fig S4: Genome-wide distribution pattern of siRNA loci, supporting Fig 4 and Fig 5.
- Fig S5: Classification of TEs by length, supporting Fig 4 and Fig 5.
- Fig S6: Relationship among siRNA loci distribution, TE, and DNA methylation across the genome, supporting Fig 4 and Fig 5.
- Fig S7: CG and CHG methylation in mature embryo, supporting Fig 5.
- Fig S8: DNA methylation in zygote, supporting Fig 5.
- Fig S9: DNA methylation in egg cell, supporting Fig 5.
- Fig S10: DNA methylation in sperm cell, supporting Fig 5.
- Fig S11: DNA methylation at siren loci, supporting Fig 2 and Fig 5.
- Fig S12: DNA methylation at siren loci, supporting Fig 2 and Fig 5.
- Fig S13: Pearson correlation of 24-nt siRNAs across replicates.
- Fig S14: PCR and Sanger sequencing validation of siRNA reads.

**A**

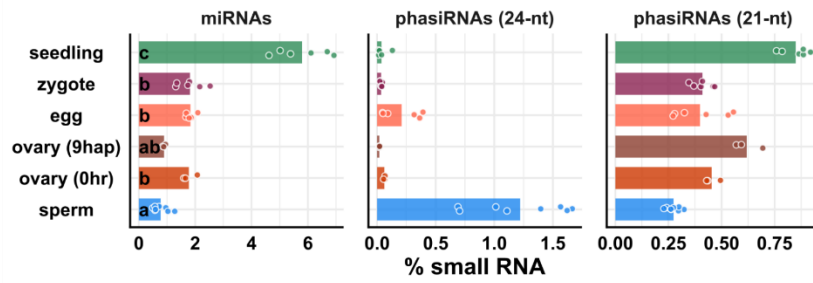

**B**

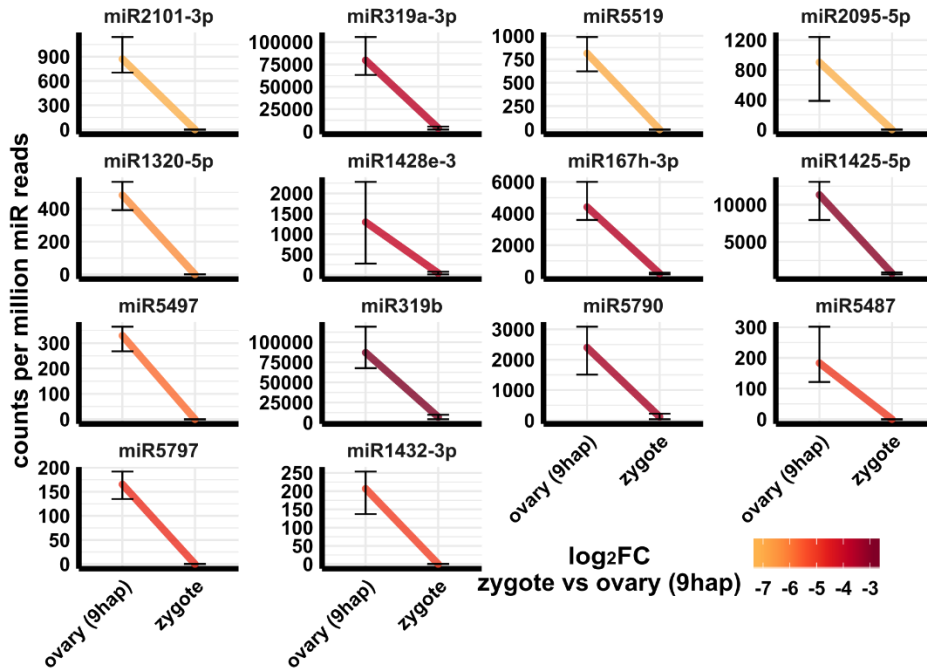

**C**

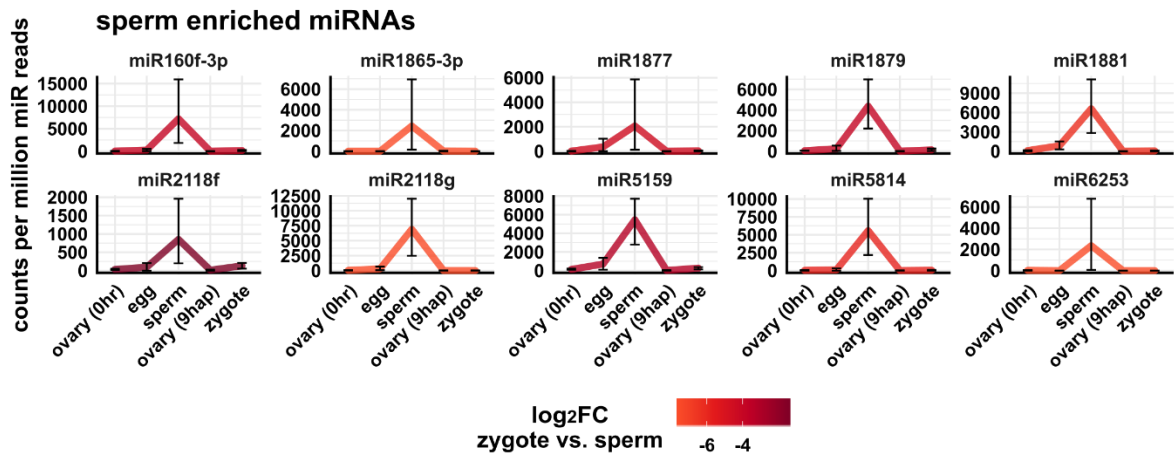

**Fig S1, supporting Fig 1**

(A) Relative abundances of miRNAs, 21- and 22-nt phasiRNAs in zygote small RNA transcriptomes. x-axis values are relative to total 20 – 25-nt small RNA reads. Each data point is a small RNA transcriptome. Letter grouping ( $\alpha = 0.05$ ) is based on linear models with logit transformation followed by Tukey tests.

(B) Significantly downregulated miRNAs in zygote relative to post-fertilization ovary. Differential abundance is determined by a 2-fold decrease and  $FDR < 0.05$  cutoffs. y-axis values are relative to per million miRNA reads in each sample. Color code reflects  $\log_2FC$  values for zygote - ovary. Error bars are 95% confidence intervals.

(C) Additional sperm-enriched miRNAs are downregulated in the zygote (see also **Fig 1E**). Sperm-enriched is determined by  $>1000$  reads per million miRNA reads in sperm, but  $< 500$  reads per million miRNA reads in egg. y-axis values are relative to per million miRNA reads. Color code reflects  $\log_2FC$  values for zygote - sperm. Error bars are 95% confidence intervals. Zygote and 9 hap ovary data are from this study, all other data from Li et al., (2020).

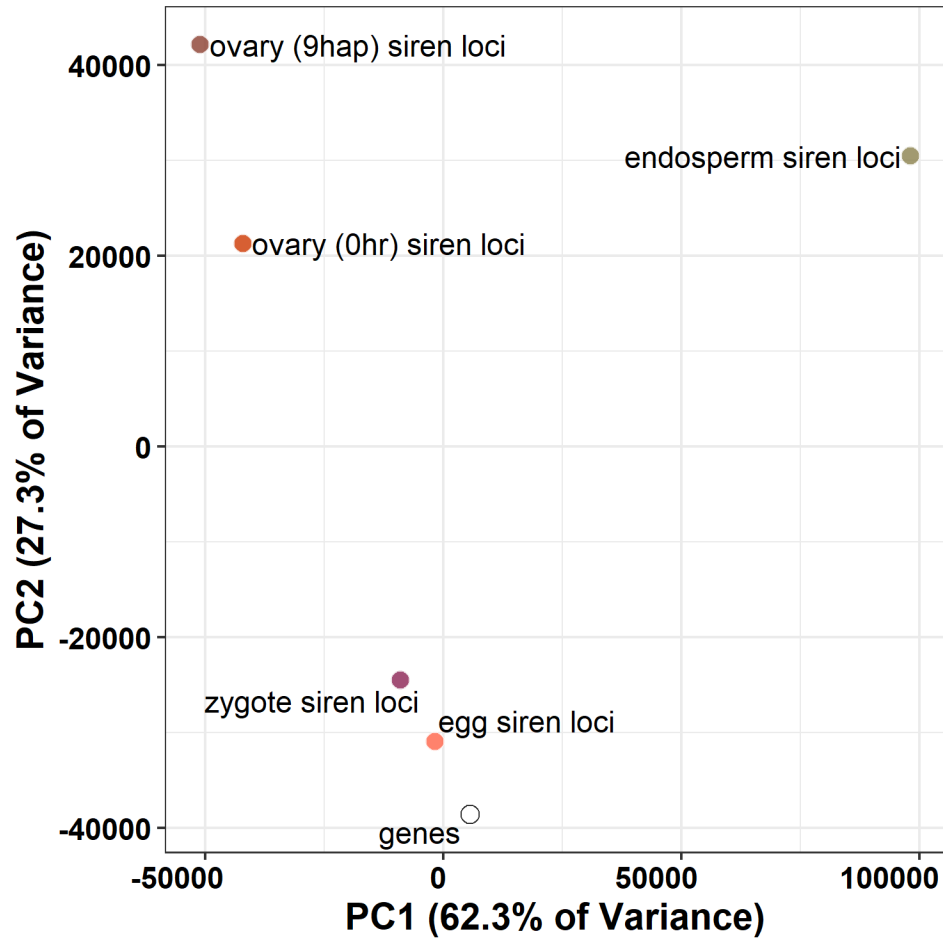

**Fig S2, supporting Fig 2**

Principal component plot for siren loci distribution across the genome. Distributions are evaluated at 50-kb resolution across the genome. Each data point is the distribution of a siren loci category.

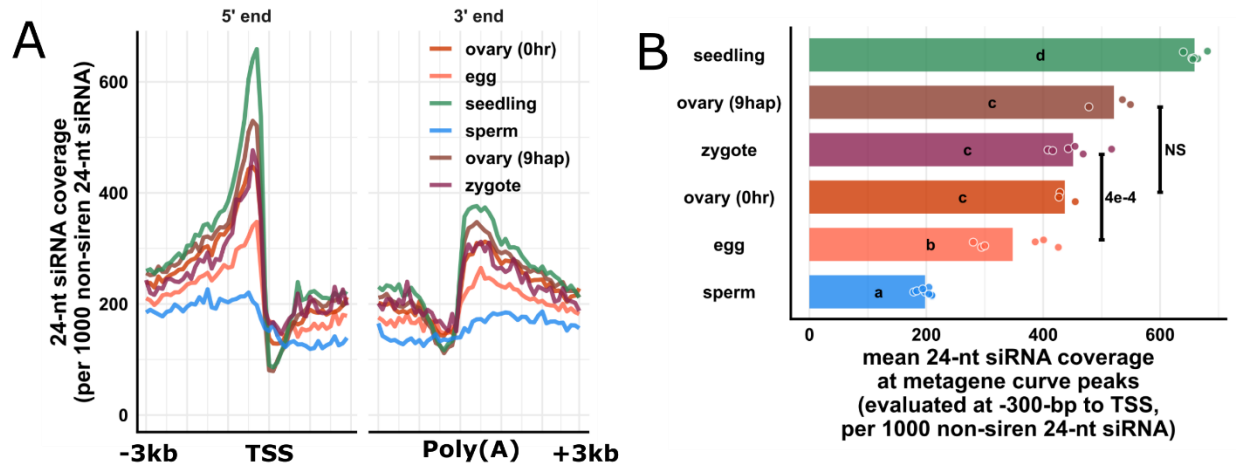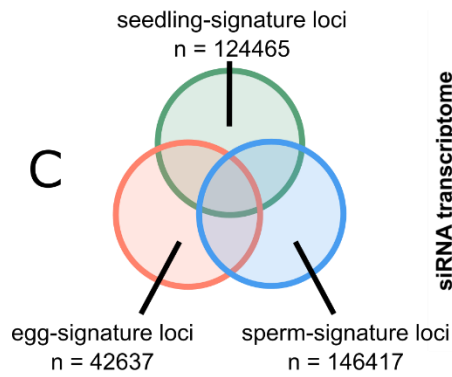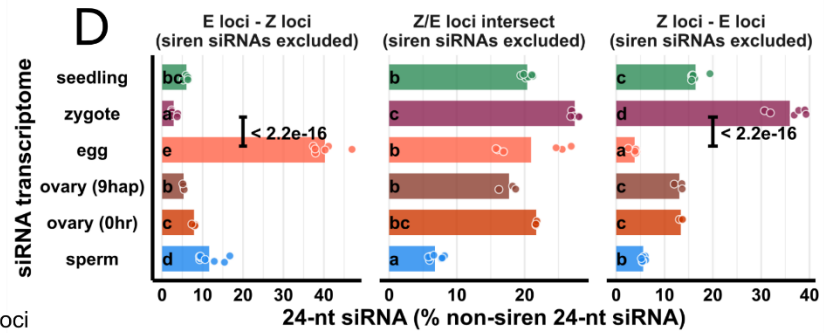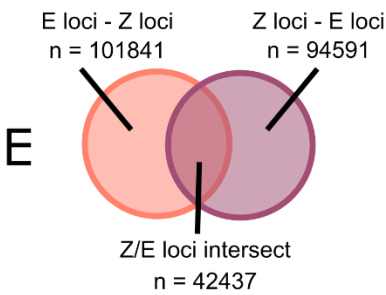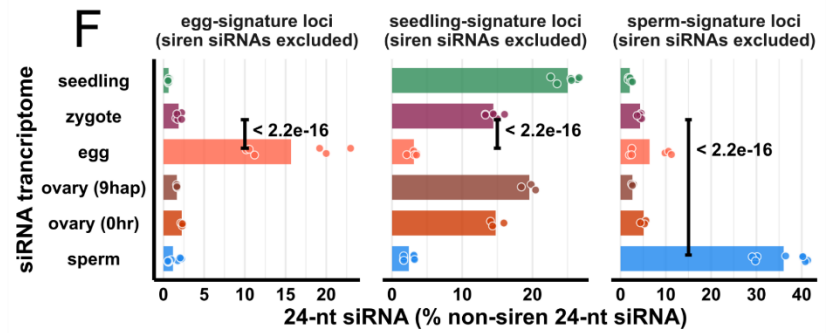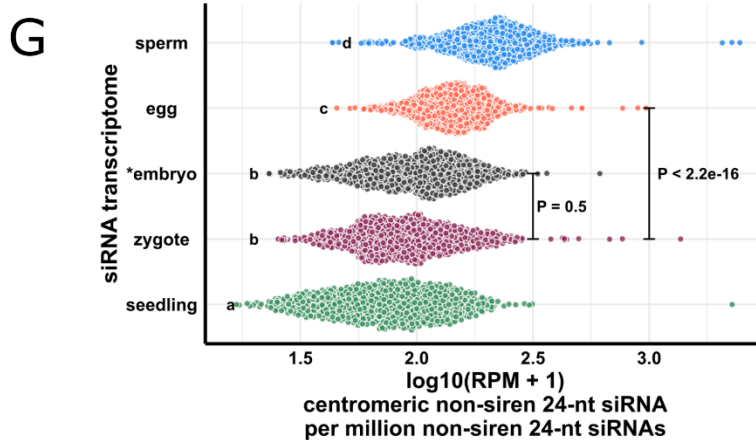

**Fig S3, supporting Fig 3 and Fig 4**

(A) Metagene coverage plot for 24-nt non-egg-siren siRNAs. Coverage is measured over 100-bp intervals and normalized per 1000 24-nt non-egg-siren siRNAs. Vertical grid lines are 500-bp intervals. TSS transcription start site, poly(A) polyadenylation site.

(B) Quantification of (A) at the interval from 300 to 200-bp upstream of TSS, corresponding to the peaks of metagene curves. Each data point is an siRNA transcriptome and bar heights are averages. x-axis values are normalized per 1000 24-nt non-egg-siren siRNAs.

(C) Venn diagram illustrating egg-signature loci (egg – seedling – sperm siRNA loci), seedling-signature loci (seedling – egg – sperm siRNA loci), and sperm-signature loci (sperm – egg – seedling siRNA loci), as in **Fig 3C**.

(D) Bar plot showing relative abundances of 24-nt siRNAs across siRNA loci categories defined in **D**. The zygote siRNA transcriptome was not used to define these locus categories. Each data point is an siRNA transcriptome. Bar heights are averages. x-axis values are normalized to total 24-nt non-egg-siren siRNAs.

(E) Venn diagram illustrating E loci – Z loci, Z loci – E loci, and Z/E loci intersect, as in **Fig 4A**.

(F) Quantification of 24-nt siRNA relative abundances across siRNA loci categories defined in **F**. Each data point is a siRNA transcriptome. Bar heights are averages. x-axis-values are relative to total 24-nt non-egg-siren siRNAs.

(G) Quantification of non-siren 24-nt siRNA at centromeric regions. Each data point is a 50-kb window at centromeric regions across 12 rice chromosomes. x-axis values normalized to per million total non-siren 24-nt siRNAs and log10 transformed. Biological replicates were averaged prior to the analysis.

Letter grouping ( $\alpha = 0.05$ ), and P values are based on Tukey tests. Sizes of overlap in Venn diagrams are not to scale. Zygote and 9 hap ovary data are from this study; Embryo data from Rodrigues et al. (2013); all other data from Li et al. (2020).

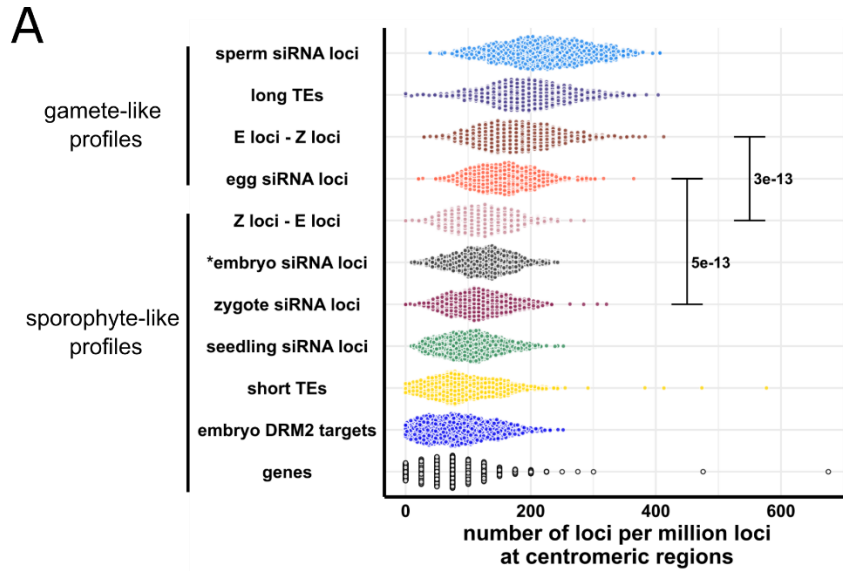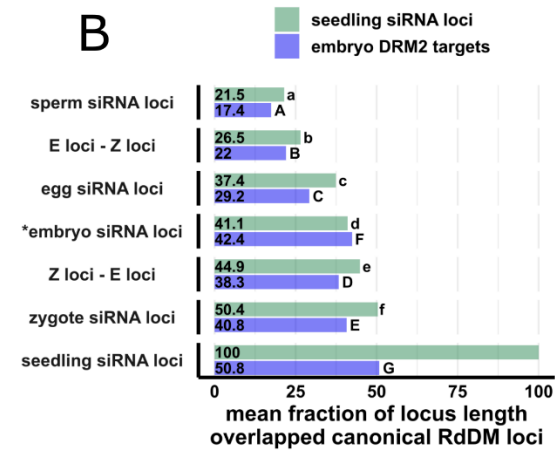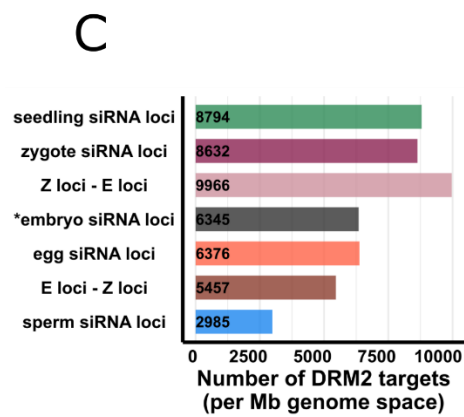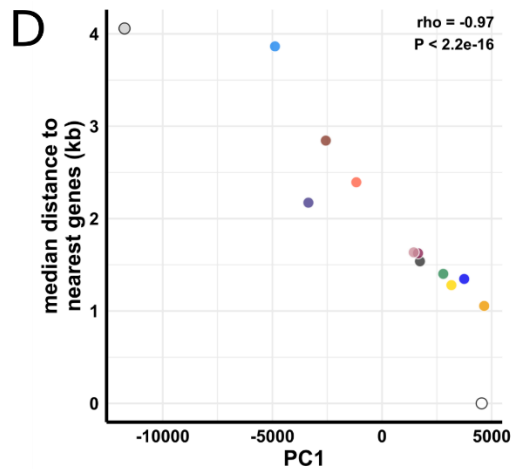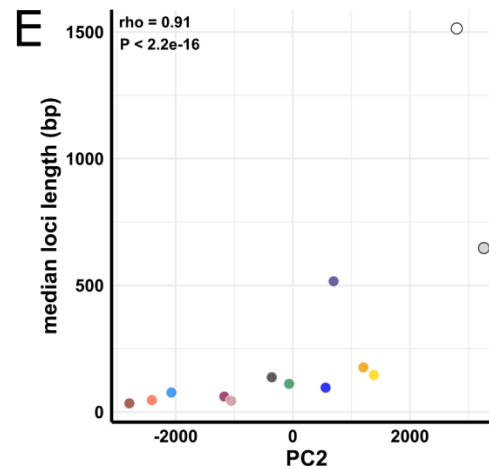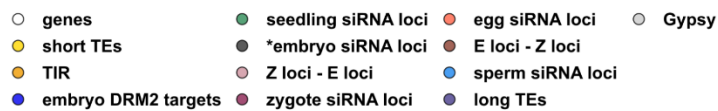

**Fig S4: supporting Fig 4 and Fig 5.**

(A) Quantification of **Fig 4C**. Each data point is a 50-kb genomic window inside centromeric regions for all 12 rice chromosomes. x-axis values are number of loci per million total siRNA loci for each loci category.

(B) Bar plots showing mean locus length overlapped by seedling siRNA or embryo DRM2 targets across siRNA loci categories. Statistical comparisons are made across siRNA loci categories within a locus category.

(C) Bar plots showing number of embryo DRM2 targets overlapped by different siRNA loci categories. x-axis values normalized to per million base pairs occupied by siRNA loci categories.

(D) Scatter plot showing correlation of PC1 (**Fig 4D**) and median distance to nearest genes (**Fig 5A**). Median distance to nearest genes for genes is set to 0.

(E) Scatter plot showing correlation of PC2 (**Fig 4D**) and median length of locus.

Letter grouping ( $\alpha = 0.05$ ) and P values are based on Tukey tests. Rho, Spearman's rank order correlation coefficient. Short TEs are transposable elements of length 50-bp to 250-bp. Long TEs are transposable elements of length greater than 250-bp. \*Embryo (7 days after flowering) siRNA data from Rodrigues et al (2013), which was based on a single replicate. Except zygote, all other data from Li et al. (2020).



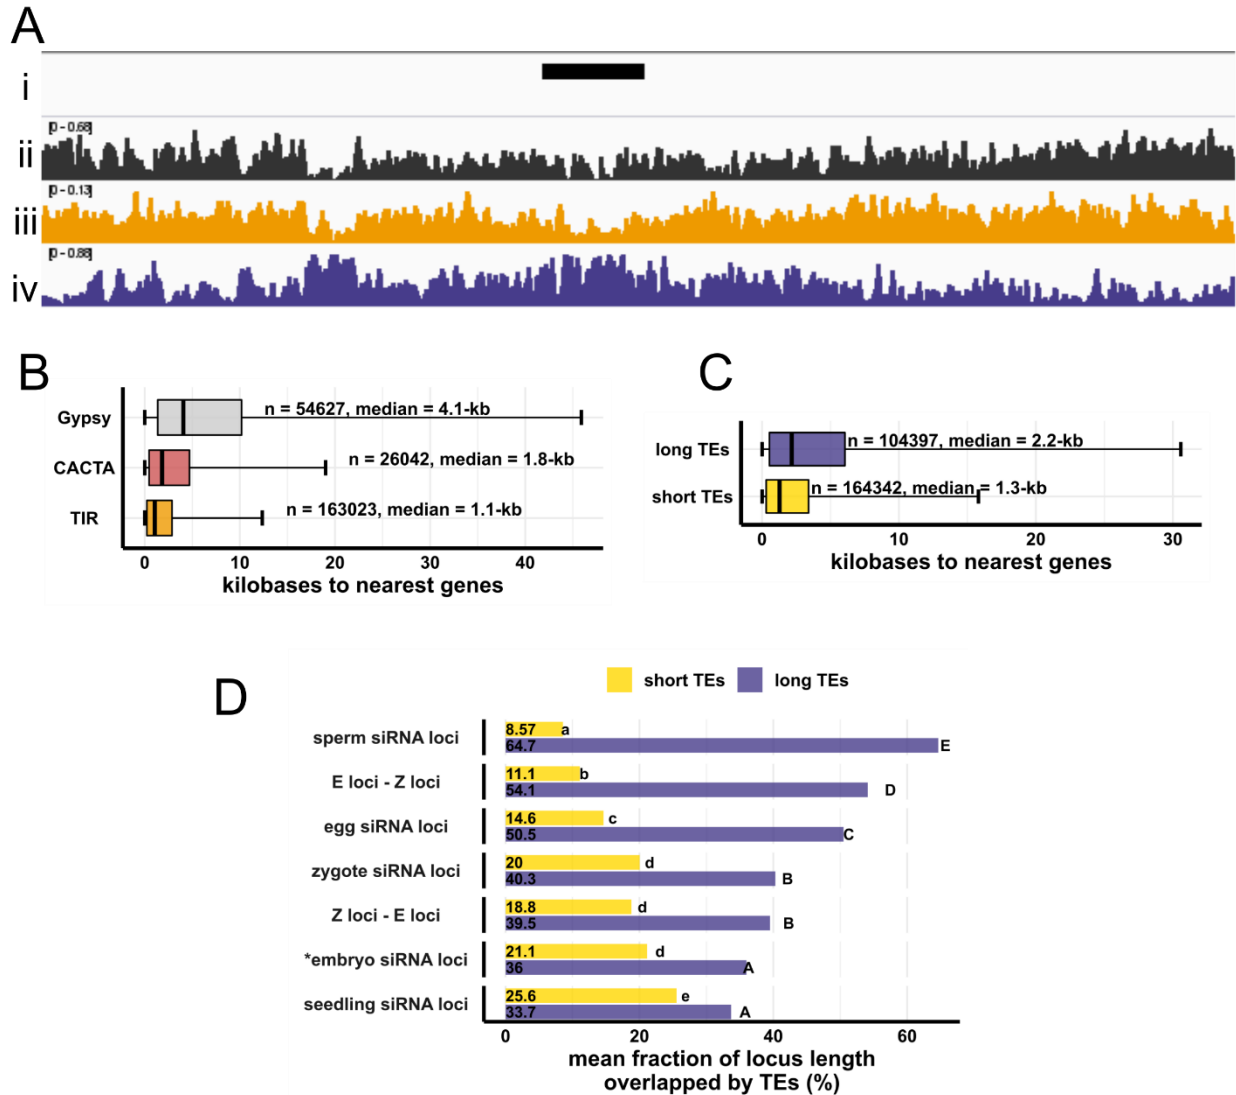

**Fig S5: supporting Fig 4 and Fig 5**

(A) Distribution of short TEs (50-250-bp) and long TEs (> 250-bp) along chromosome 8. i: centromeric region; ii: non-TE genes; iii: short TEs; iv: long TEs. Chromosome 8 is chosen because it is one of the chromosomes with a completed sequenced centromeric region (Mizuno et al., 2018).

(B) and (C) box plots showing distance of TEs to nearest genes. Middle lines are median. Boxes span interquartile range. Whiskers span 2.5<sup>th</sup> and 97.5<sup>th</sup> percentiles. TIR: non-CACTA TIR elements, CACTA: CACTA DNA transposons; *Gypsy*: *Gypsy* retrotransposons; short TEs: TEs of lengths 50-250-bp; long TEs: TEs with length > 250-bp.

(D) Bar plots showing mean locus length overlapped by short TEs or long TEs across siRNA loci categories. Statistical comparisons are made across siRNA loci categories within a TE length category.

● seedling siRNA loci ● zygote siRNA loci ● egg siRNA loci ● sperm siRNA loci  
 ● \*embryo siRNA loci ● Z loci - E loci ● E loci - Z loci

**A**

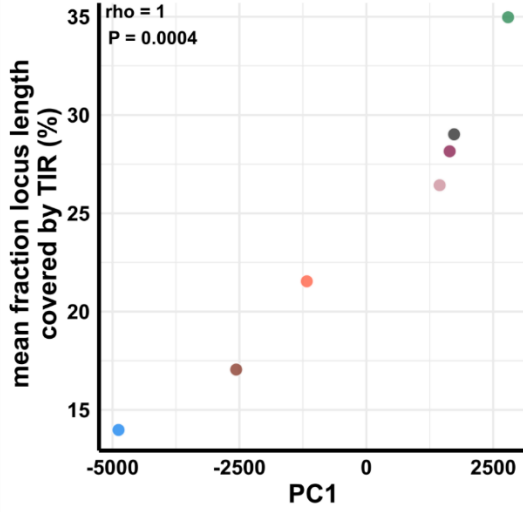

**B**

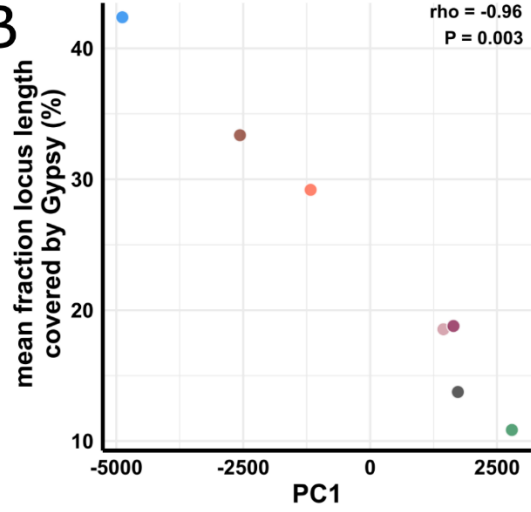

**C**

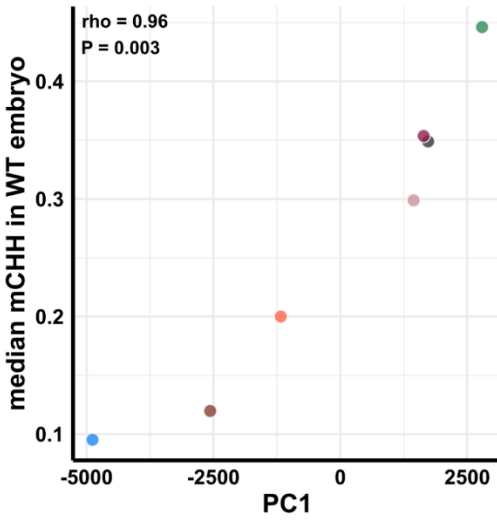

**D**

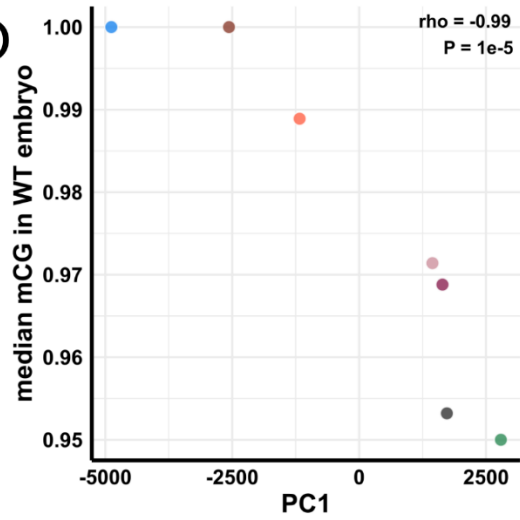

**E**

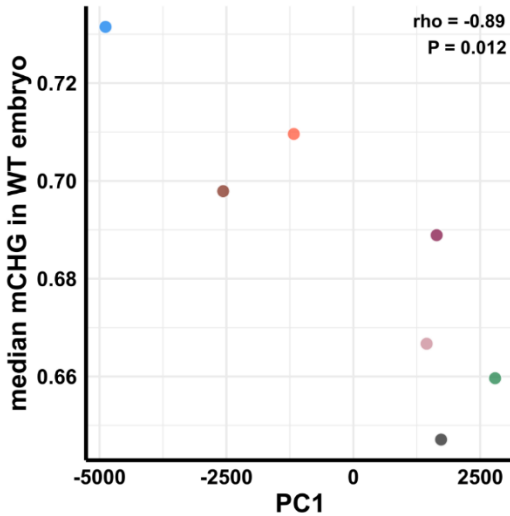

**F**

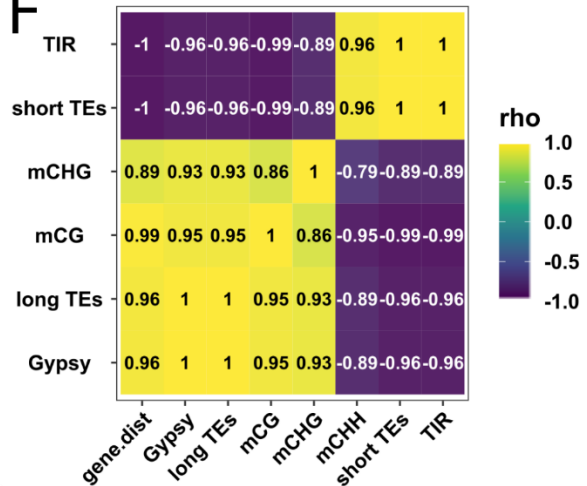

**Fig S6, supporting Fig 4 and Fig 5**

(A) Scatter plot showing correlation of PC1 (**Fig 4C**) and mean fraction of locus length covered by short transposons (50-bp – 250-bp) (**Fig 5B**).

(B) Scatter plot showing correlation of PC1 (**Fig 4C**) and mean fraction of locus length covered by long retrotransposons (> 250-bp) (**Fig 5B**).

(C), (D) and (E) Scatter plot showing correlation of PC1 (**Fig 4C**) and median methylation at mCHH, mCG and mCHG contexts, respectively (**Fig 5C**, see also **Fig S5**).

(F) Correlation heat map showing pairwise rank order correlation between distance to nearest genes (gene.dist, **Fig 5A**), Long TEs overlaps (**Fig 5B**), DNA methylation (**Fig 5C**, see also **Fig S5**), and short TEs overlaps (**Fig 5B**).

Rho, Spearman's rank order correlation coefficient. \*Embryo (7 days after flowering) siRNA data from Rodrigues et al (2013), which was based on a single replicate. Except zygote, all other data from Li et al. (2020).

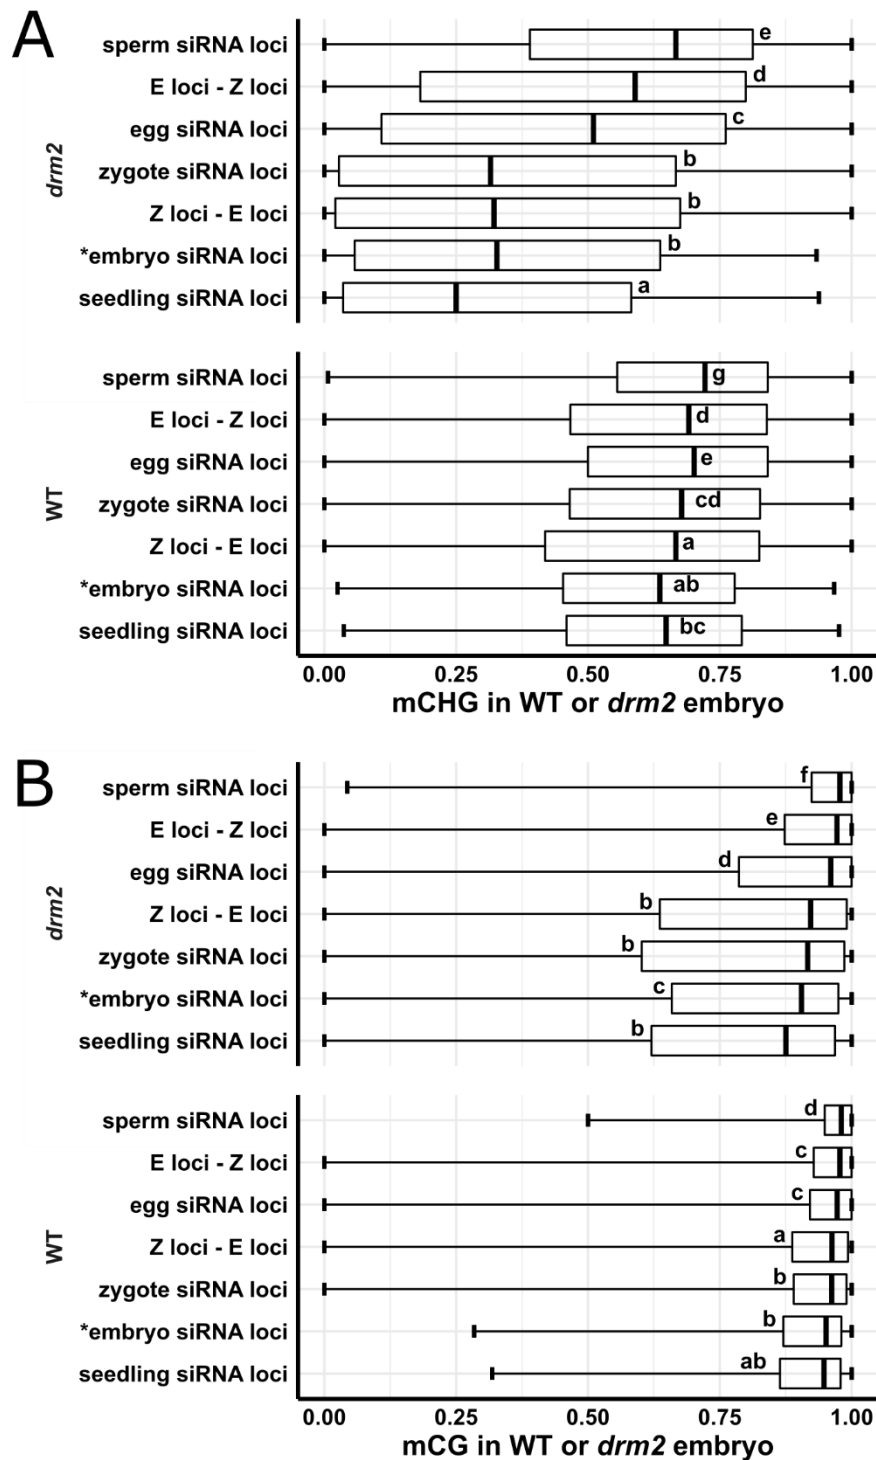

**Fig S7, supporting Fig 5**

Boxplots showing mCG (A) and mCHG (B) methylation level in wildtype or *drm2* embryo. Middle lines are median. Boxes span interquartile range. Whiskers span 2.5<sup>th</sup> and 97.5<sup>th</sup> percentiles. Letter groupings are based on Tukey tests. \*Embryo (7 days after flowering) siRNA data from Rodrigues et al (2013), which was based on a single replicate. Except zygote, all other data from Li et al. (2020).

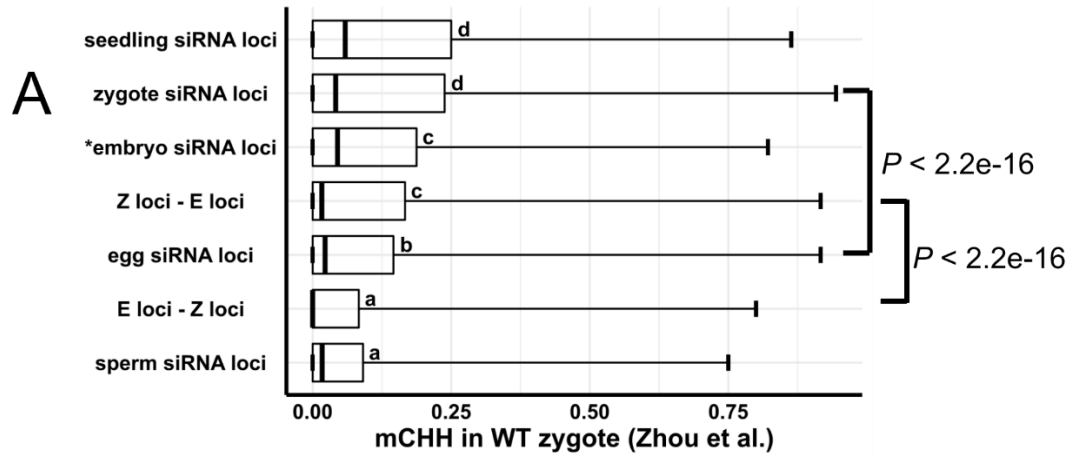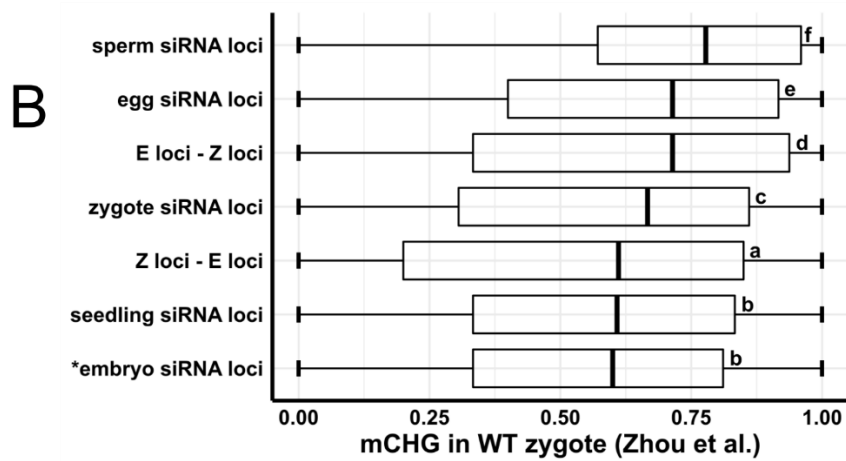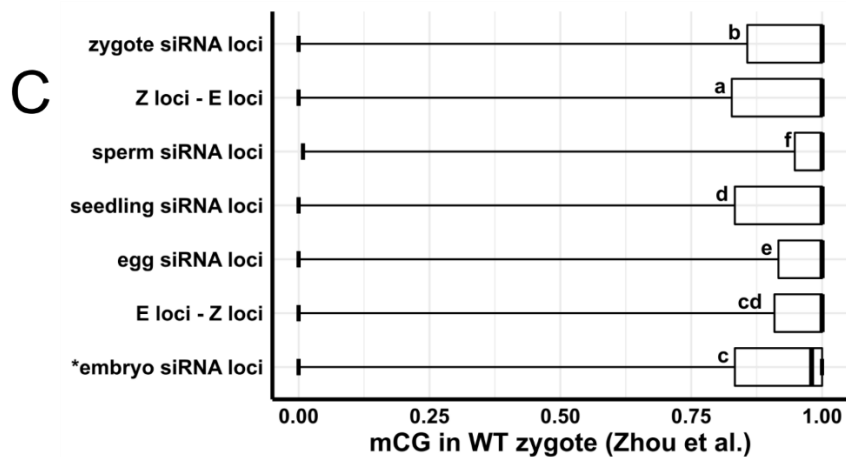

**Fig S8, supporting Fig 5**

Boxplots showing DNA methylation level in wildtype zygote at CHH (A), CHG (B) and CG (C) contexts. Middle lines are median. Boxes span interquartile range. Whiskers span 2.5<sup>th</sup> and 97.5<sup>th</sup> percentiles. \*Embryo (7 days after flowering) siRNA data from Rodrigues et al (2013), without replicates. Zygote methylation data from Zhou et al. (2021).

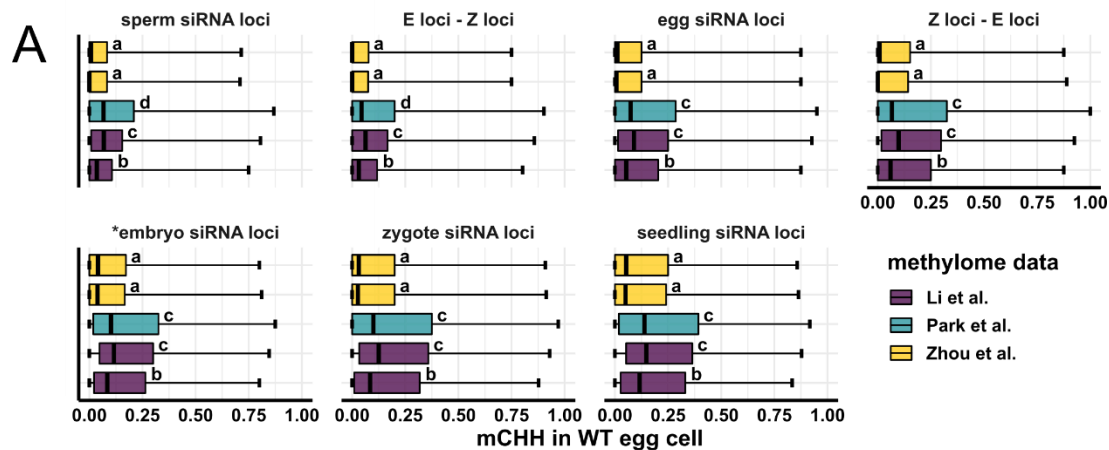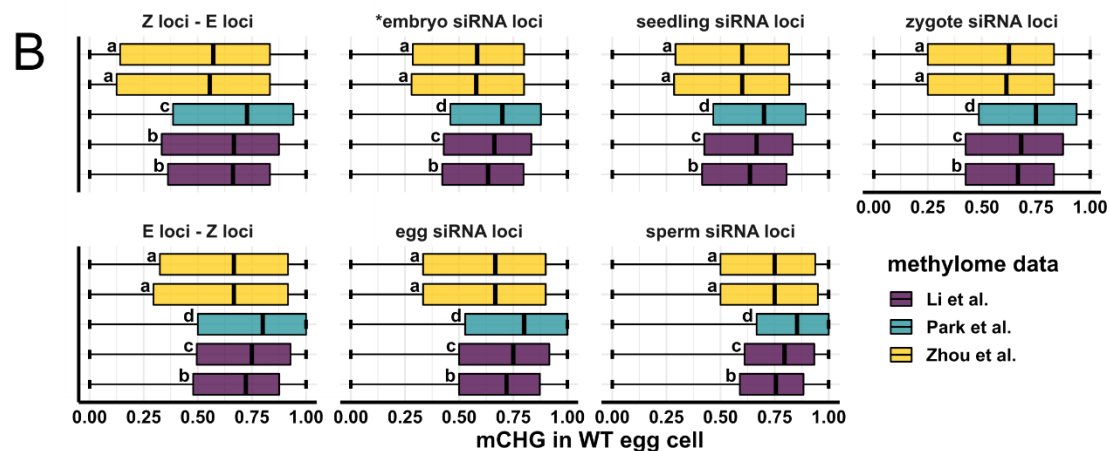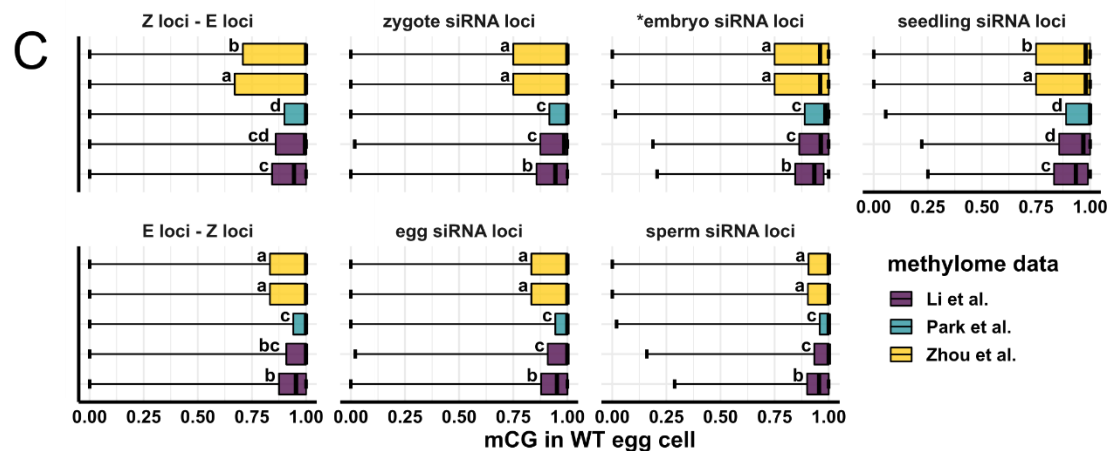

**Fig S9, supporting Fig 5**

Boxplots showing DNA methylation level in wildtype egg cell at CHH (A), CHG (B) and CG (C) contexts. Middle lines are median. Boxes span interquartile range. Whiskers span 2.5<sup>th</sup> and 97.5<sup>th</sup> percentiles. \*Embryo (7 days after flowering) siRNA data from Rodrigues et al (2013), which was based on a single replicate. Data sources: Park et al. (2016), Li et al. (2020), and Zhou et al. (2021).

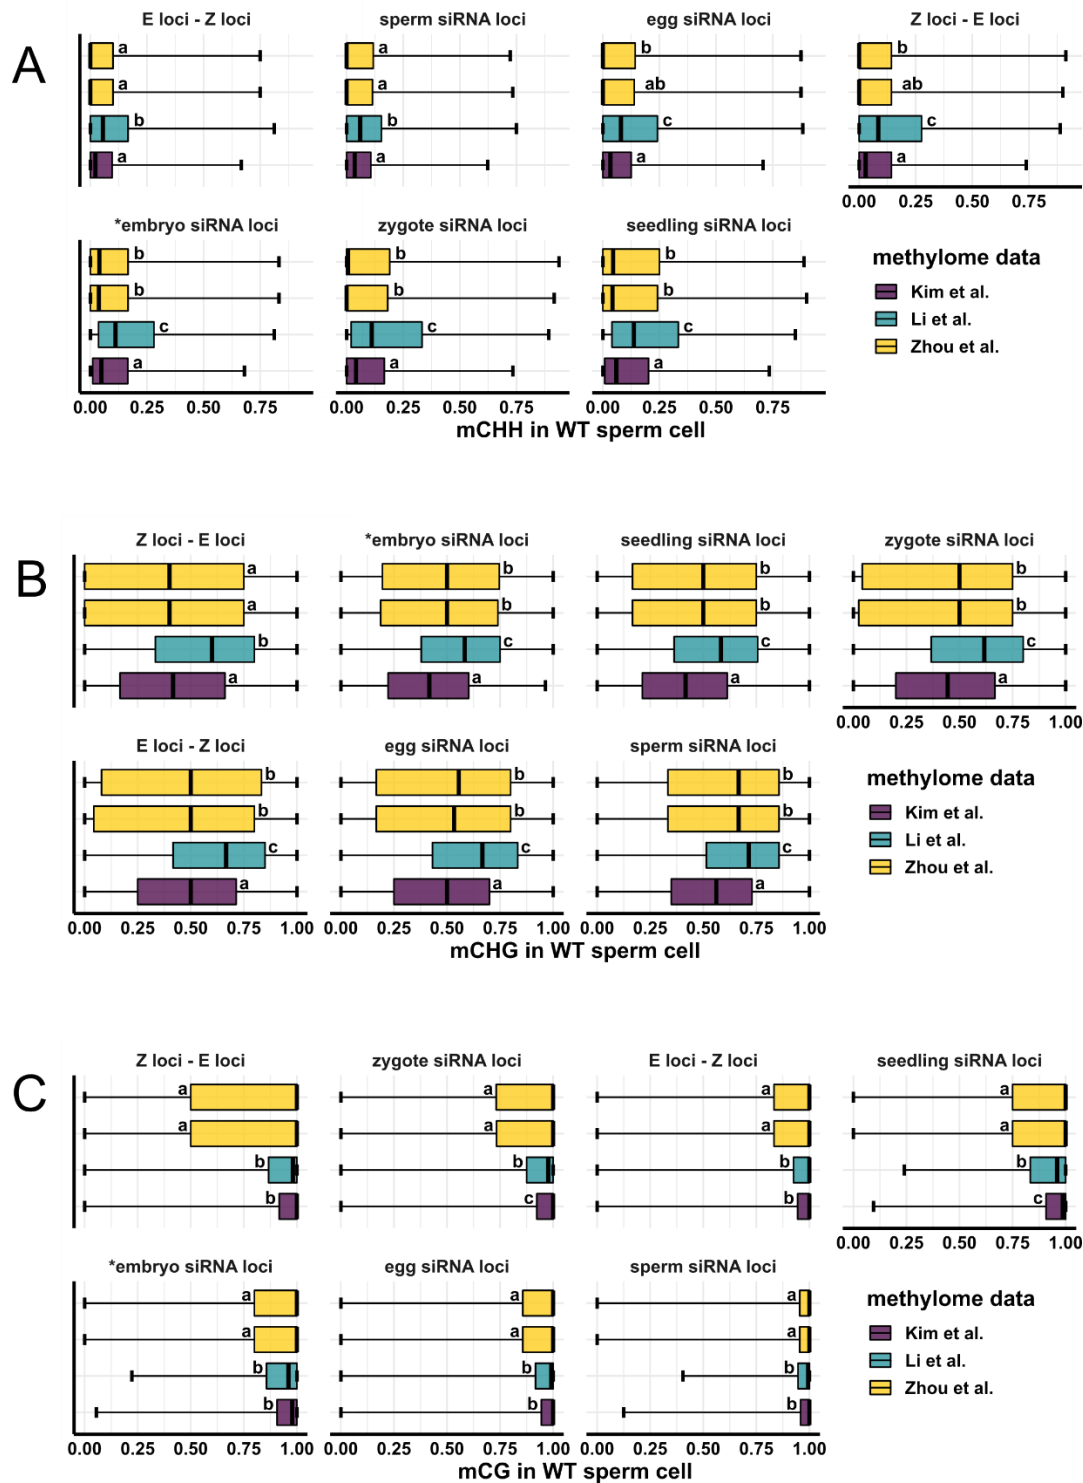

**Fig S10, supporting Fig 5**

Boxplots showing DNA methylation level in wildtype sperm cell at CHH (A), CHG (B) and CG (C) contexts. Middle lines are median. Boxes span interquartile range. Whiskers span 2.5<sup>th</sup> and 97.5<sup>th</sup> percentiles. \*Embryo (7 days after flowering) siRNA data from Rodrigues et al (2013), which was based on a single replicate. Data sources: Kim et al. (2019), Li et al. (2020), and Zhou et al. (2021).

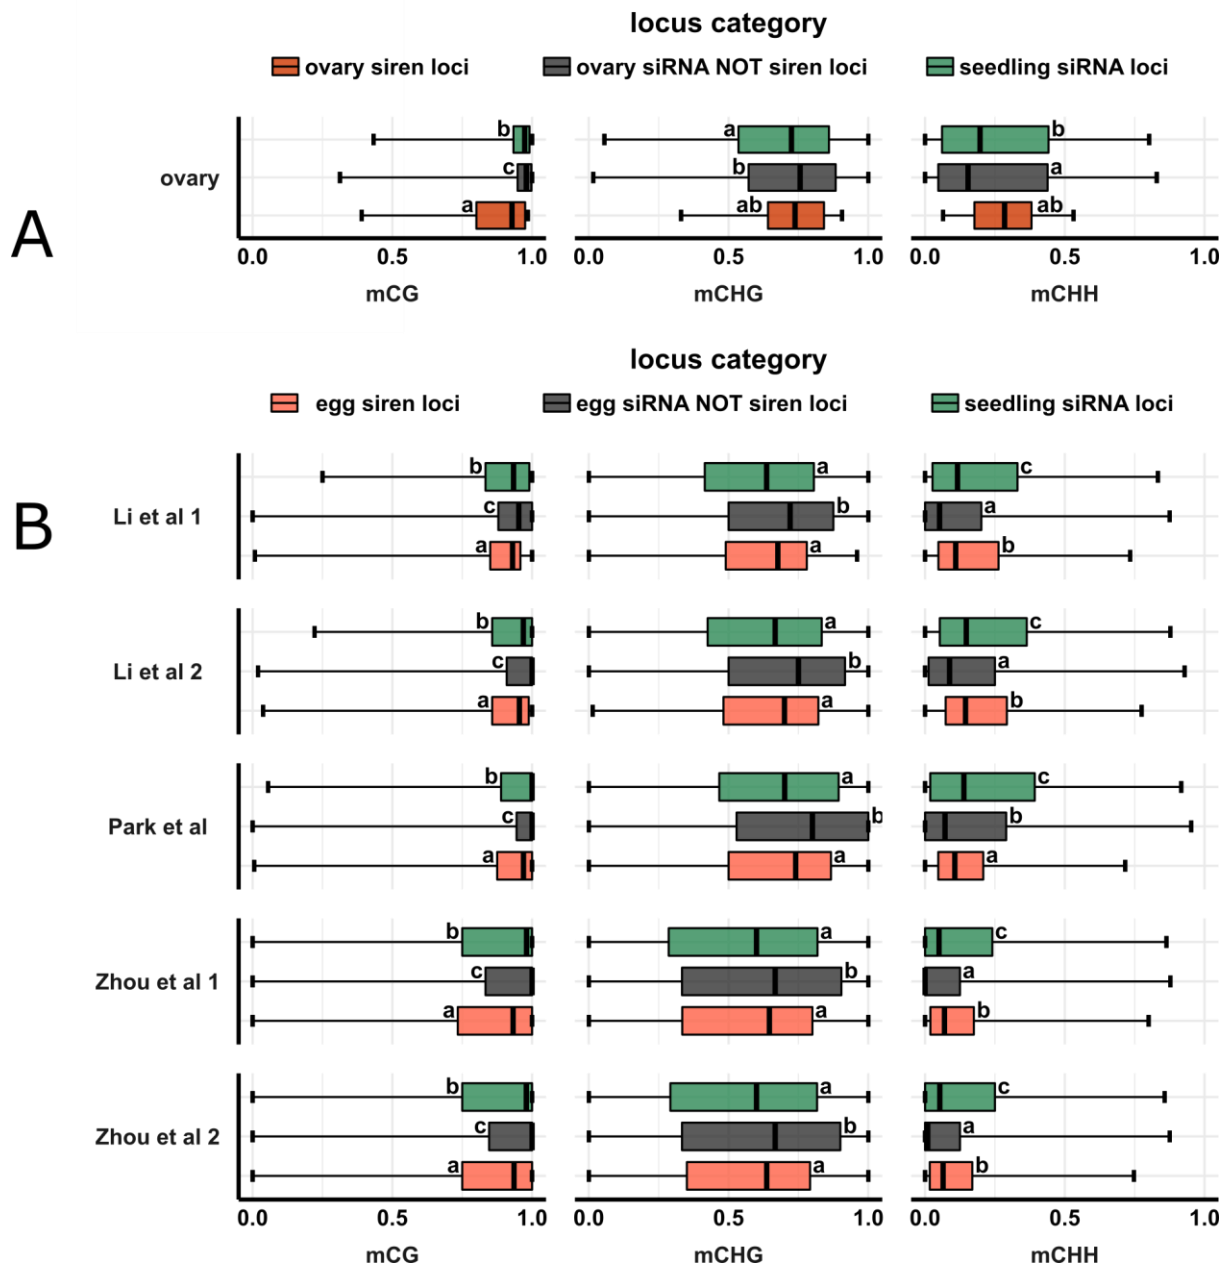

**Fig S11, supporting Fig 2 and Fig 5**

Boxplots showing DNA methylation level in ovary (A), and egg cell (B). Middle lines are median. Boxes span interquartile range. Whiskers span 2.5<sup>th</sup> and 97.5<sup>th</sup> percentiles. siRNA NOT siren loci refer to siRNA loci that are not siren loci. Letter groupings are based on Tukey tests. Data sources: Park et al. (2016), Li et al. (2020), and Zhou et al. (2021).



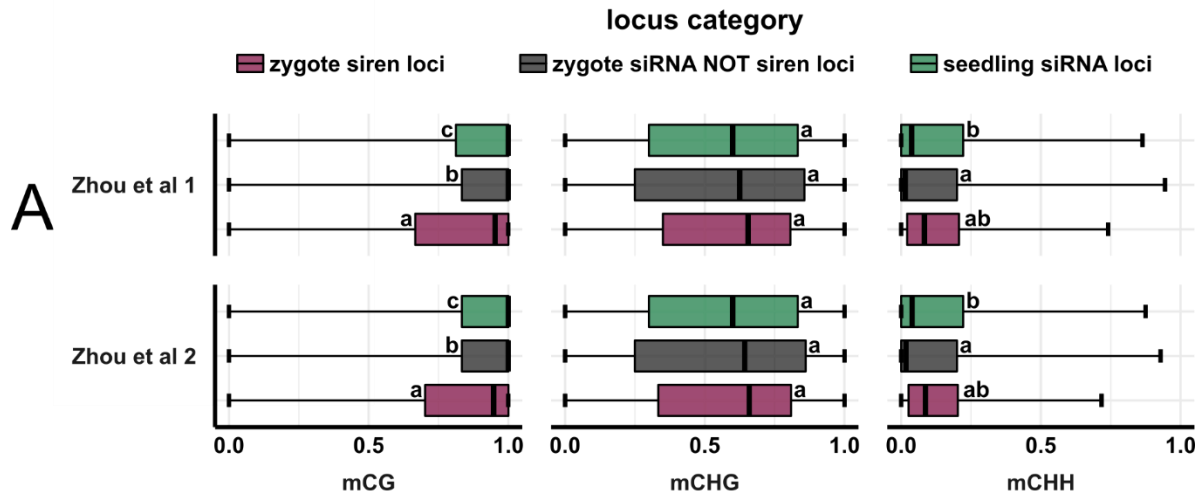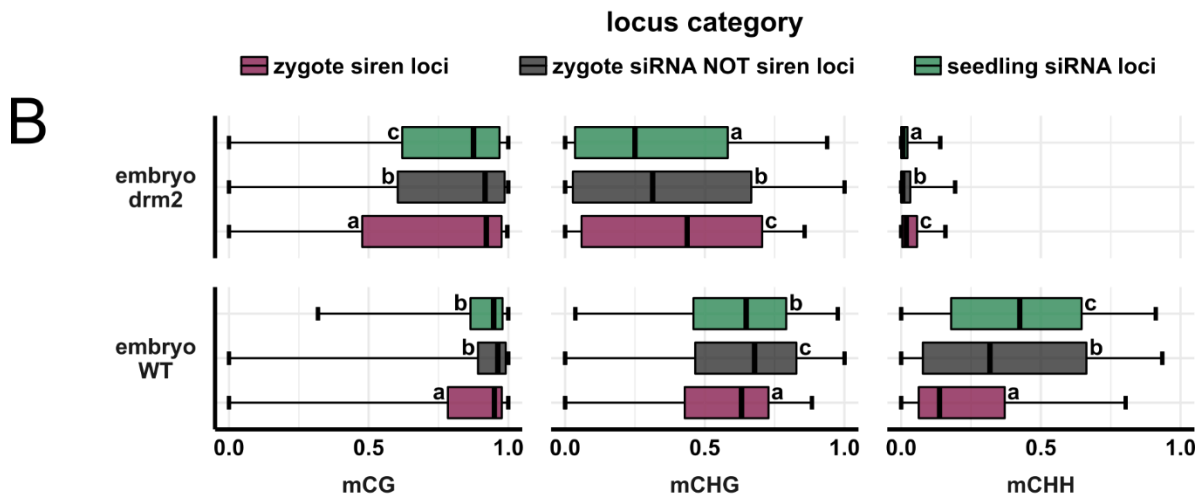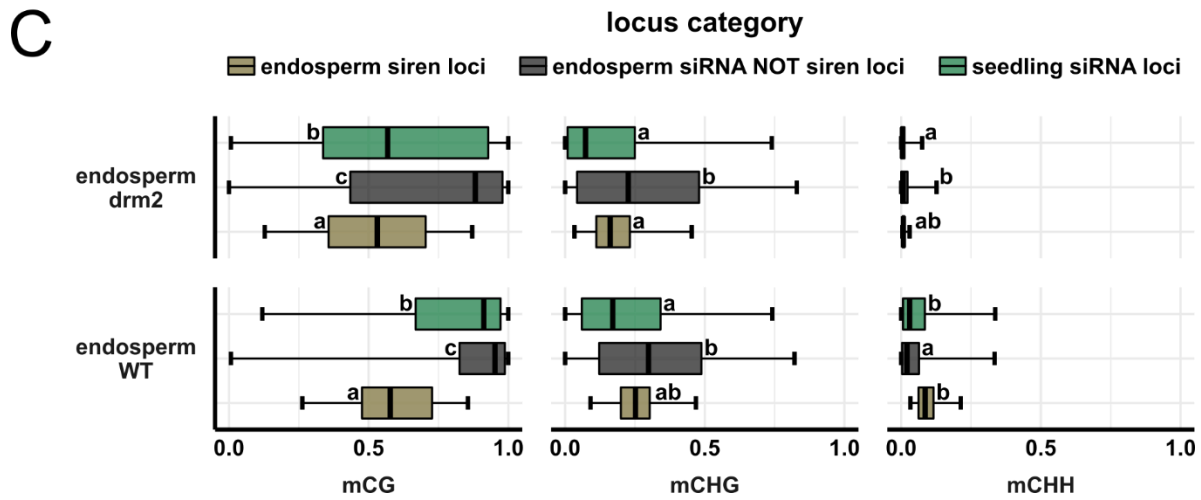

**Fig S12, supporting Fig 2 and Fig 5**

Boxplots showing DNA methylation level in zygote (A) wildtype or *drm2* embryo (B) and wildtype or *drm2* endosperm (C). Middle lines are median. Boxes span interquartile range. Whiskers span 2.5<sup>th</sup> and 97.5<sup>th</sup> percentiles. siRNA NOT siren loci refer to siRNA loci that are not endosperm siren loci. Letter groupings are based on Tukey tests. Zygote (Zhou et al.) data from Zhou et al. (2021). All other data from Li et al. (2020) and this study.

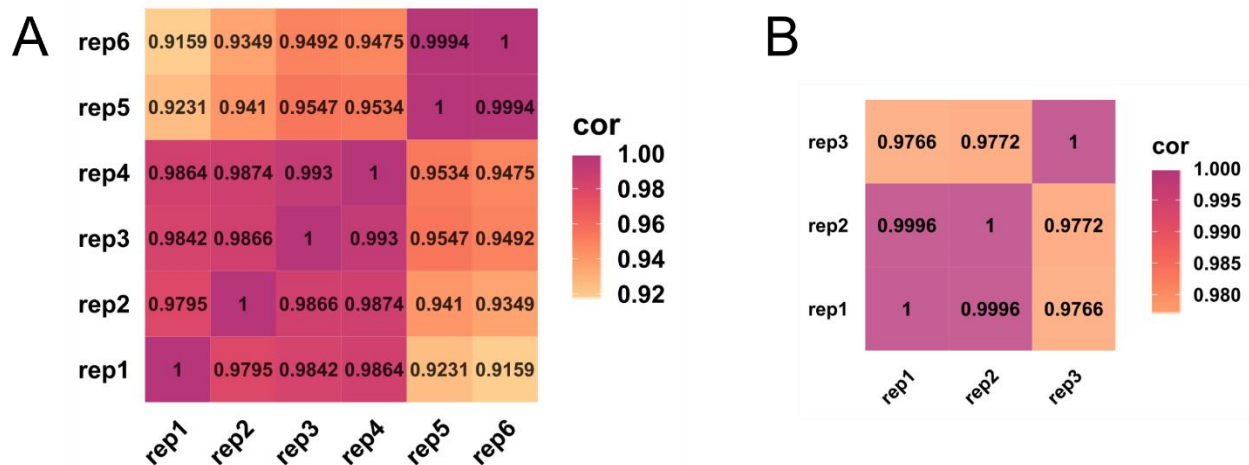

**Fig S13, Pearson correlation of 24-nt siRNAs across replicates.**

(A) Pairwise Pearson's correlation coefficient between six zygote libraries.

(B) Pairwise Pearson's correlation coefficient between three post-fertilization ovary libraries.

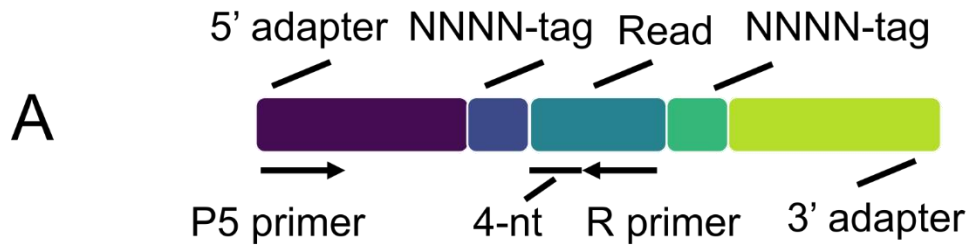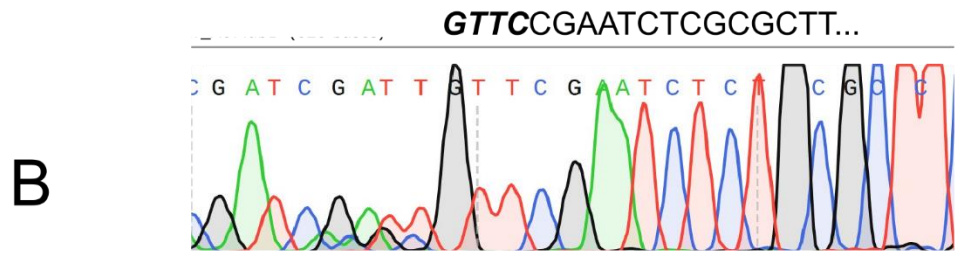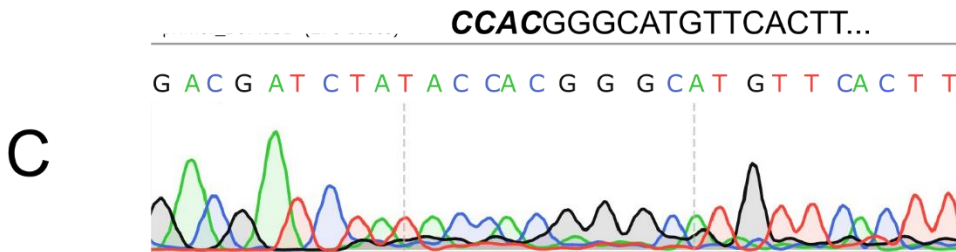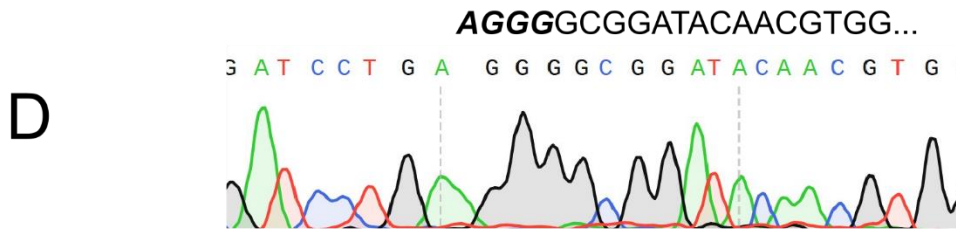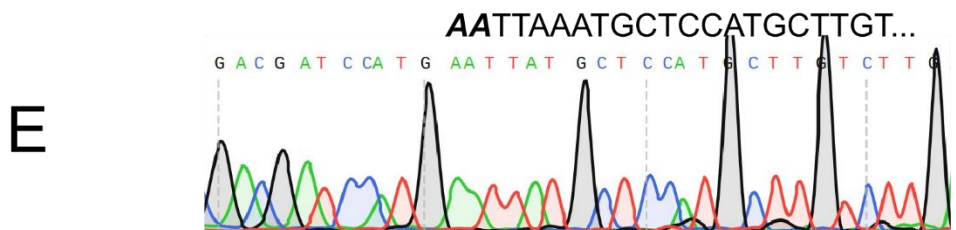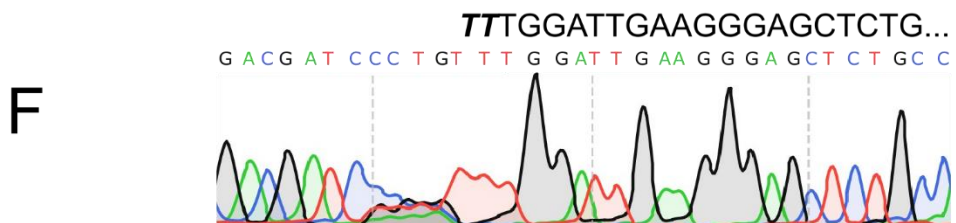

**Fig S14, PCR and Sanger sequencing confirmation of Z-E loci siRNA reads.**

(A) Schematics of the library molecule and the design of PCR. The Illumina universal P5 sequence is used as the forward primer. The reverse complement of the 3' portion of the small RNA read is used as the reverse primer. Note that the terminal 2 – 4-nt of the siRNA is omitted out in the reverse primer, such that the identity of the PCR product can be confirmed by Sanger sequencing. Amplifications that yielded PCR products of the correct predicted size were selected for sequencing, and the sequences are presented in (B) through (F).

(B) Sanger sequencing trace for the major siRNA at loci: Chr5:24981248-24981273. Bold italic text represents nucleotides not determined by the primer. Primer sequence: 5'-TGGCGGAAGCGCAGAGATTC-3'

(C) Sanger sequencing trace for the major siRNA at loci: Chr10:15829605-15829629. Bold italic text represents nucleotides not determined by the primer. Primer sequence: 5'-ATATCAAAGTGAACATGCCC-3'

(D) Sanger sequence tracing for the major siRNA at loci: Chr3:9303476-9303712. Bold italic text represents nucleotides not determined by the primer. Primer sequence: 5'-TCCACCCACGTTGTATCCGC-3'

(E) Sanger sequence tracing for the major siRNA at loci: Chr3:20476277-20476300. Bold italic text represents nucleotides not determined by the primer. Primer sequence: 5'-TCAAGACAAGCATGGAGCATAA-3'

(F) Sanger sequence tracing for miRNA159b as a positive control. Bold italic text represents nucleotides not determined by the primer. Primer sequence: 5'-GGCAGAGCTCCCTTCAATCCA-3'
