# Supplementary material for: Resetting of the 24-nt siRNA landscape in rice zygotes
Source: HighWire-hosted journal article supplement (doi:10.1101/gr.275981.121), 2021-12-23
Supplement: Supplemental_Table_S2.xlsx [file Supplemental_Table_S2.xlsx]

## Sheet: Sheet1
Supplemental Table S2: Summary of pollination experiments
	florets	florets with seed	florets without seed	% success
manually pollinated	101	98	3	97.0297
unpollinated	137	2*	135	1.45985
*occasionally incomplete emasculation occurs

## Sheet: Legends
Explanations of headers
florets	total number of rice florets used in experiment
florets with seed	number of florets with successful fertilization
florets without seed	number of florets without fertilization, or with unsuccessful fertilization
% success	number of florets with successful fertilization / total number of rice florets used * 100%
