# Supplementary material for: Resetting of the 24-nt siRNA landscape in rice zygotes
Source: HighWire-hosted journal article supplement (doi:10.1101/gr.275981.121), 2021-12-23
Supplement: Supplemental_Table_S3.xlsx [file Supplemental_Table_S3.xlsx]

## Sheet: Sheet1
Supplemental Table S3: Loci and primer sequences used for PCR (see also Fig S14)
Chr	start	end	egg	zygote	Name	MajorRNA	Primer_sequence	exp	correct_product
1	17681924	17682196	335089	166766	miRNA159a.1	UUUGGAUUGAAGGGAGCUCUG	GGCAGAGCTCCCTTCAATCCA	positive control	Success
5	24981248	24981273	0	105.526	Cluster_104743	GUUCGAAUCUCUGCGCUUCCGCCA	TGGCGGAAGCGCAGAGATTC	high	Success
3	9303476	9303712	11.9474	37.6557	Cluster_52991	AGGGGCGGAUACAACGUGGGUGGA	TCCACCCACGTTGTATCCGC	high	Success
10	15829605	15829629	0	29.7638	Cluster_183734	CCACGGGCAUGUUCACUUUGAUAU	ATATCAAAGTGAACATGCCC	high	Success
3	20476277	20476300	0	26.156	Cluster_59804	AAUUAUGCUCCAUGCUUGUCUUGA	TCAAGACAAGCATGGAGCAT	high	Success
6	21165733	21165837	7.23131	48.7043	Cluster_120281	AAUGGCUUGUCUUGUUUUGUGUGC	GCACACAAAACAAGACAAGC	high	Fail
12	4902849	4903190	11.0042	46.224	Cluster_208179	CAUUGCAACACGAGGAUUGAUAAG	CTTATCAATCCTCGTGTTGC	high	Fail
5	9431976	9432131	5.03048	42.6163	Cluster_95567	ACCGUCAAUCCCCCAAACCCUGCC	GGCAGGGTTTGGGGGATTGA	high	Fail
5	29192371	29192544	0	1.57838	Cluster_107268	AUUAGAUUUAUUUUGGGACGGAGG	CCTCCGTCCCAAAATAAATC	low	Fail
9	20715096	20715312	0	1.3529	Cluster_173396	AUAAAACGAUCGCCUUUACGGGAC	GTCCCGTAAAGGCGATCGTT	low	Fail
2	5686455	5686527	0	1.3529	Cluster_29292	GGGGGUGCUGUAAAGUUUUGGCGU	ACGCCAAAACTTTACAGCAC	low	Fail
10	11861539	11862016	69.1691	0.225483	Cluster_191914	AAAGCACCAUGUCACCGAUCCCUA	TAGGGATCGGTGACATGGTG	low	Fail
11	21058593	21058698	19.4931	0.225483	Cluster_212541	GGAGUAGGAAUAGGAUUGGAGGGA	TCCCTCCAATCCTATTCCTA	low	Fail
10	16847060	16847084	67.2826	0	Cluster_195167	UUUGUCACCGCCGCCACCAAUCUC	GAGATTGGTGGCGGCGGTGA	low	Fail
12	14538260	14539710	28.9253	0	Cluster_227093	AAGAUACCGAAGACUGUGACAACG	CGTTGTCACAGTCTTCGGTA	low	Fail
6	4815219	4815243	64.1386	0	Cluster_113534	ACAGGACAGGGGAUUGACUUAGCC	GGCTAAGTCAATCCCCTGTC	low	Fail

## Sheet: Legend
Explanation of headers
Egg	RPM in egg cell
Zygote	RPM in zygote
Name	Cluster name generated by ShortStack
MajorRNA	siRNA with the most abundant reads at this siRNA loci
Primer sequence	Primer sequence used for PCR
Exp	Indicates whether the siRNA loci is classfied as high or low expression in zygote
